# Supplementary material
Source: PubMed Central journal article supplement (PMC3381890)
Supplement: NIHMS379271-supplement-Supplement.pdf [file NIHMS379271-supplement-Supplement.pdf]

# Supplementary Figure 1

*SNF7-mRFP*  
 $P_{MYO1}::(tetO)_7$   
 $P_{CMV}-tTA$   
no tetracycline

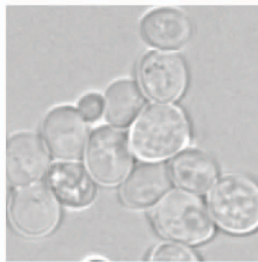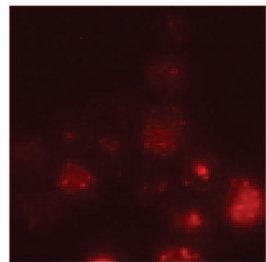

*SNF7-mRFP*  
 $P_{MYO1}::(tetO)_7$   
 $P_{CMV}-tTA$   
+ tetracycline

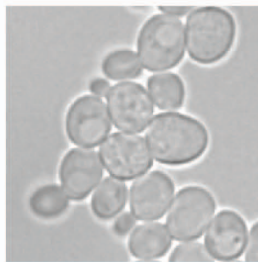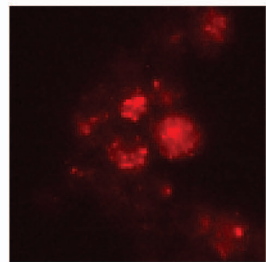

*SNF7-mRFP*  
 $P_{MYO1}::(tetO)_7$   
+ tetracycline

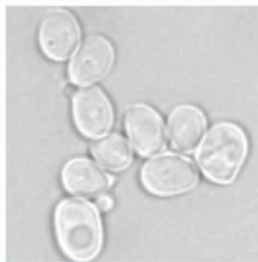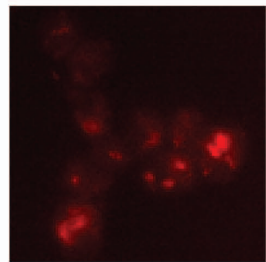

DIC

RFP

Supplementary Table 1. Yeast strains used in this study

| Strain                       | Relevant genotype                                                                                                                                                                                                                                                         | Source/Reference             |
|------------------------------|---------------------------------------------------------------------------------------------------------------------------------------------------------------------------------------------------------------------------------------------------------------------------|------------------------------|
| SEY6210                      | <i>MAT<math>\alpha</math> leu2-3,112 ura3-52 his3<math>\Delta</math>200 trp1-<math>\Delta</math>901 lys2-801 suc2<math>\Delta</math>9</i>                                                                                                                                 | (Robinson, et al., 1988)     |
| SEY6210.1                    | <i>MAT<math>\alpha</math> leu2-3,112 ura3-52 his3<math>\Delta</math>200 trp1-<math>\Delta</math>901 lys2-801 suc2<math>\Delta</math>9</i>                                                                                                                                 | (Babst, et al., 1997)        |
| SEY6210di ploid <sup>a</sup> | <i>MAT<math>\alpha</math>/<math>\alpha</math> leu2-3,112/leu2-3,112 ura3-52/ura3-52 his3<math>\Delta</math>200/his3<math>\Delta</math>200 trp1-<math>\Delta</math>901/trp1-<math>\Delta</math>901 lys2-801/lys2-801 suc2<math>\Delta</math>9/suc2<math>\Delta</math>9</i> | This study                   |
| MBY3                         | SEY6210 <i>vps4<math>\Delta</math>::TRP1</i>                                                                                                                                                                                                                              | (Babst, et al., 1997)        |
| MWY24                        | SEY6210 <i>snf7<math>\Delta</math>::HIS3</i>                                                                                                                                                                                                                              | (Wemmer, et al., 2011)       |
| GOY65                        | SEY6210 <i>bro1<math>\Delta</math>::HIS3</i>                                                                                                                                                                                                                              | (Odorizzi, et al., 2003)     |
| EEY2-1                       | SEY6210 <i>vps20<math>\Delta</math>::HIS3</i>                                                                                                                                                                                                                             | (Babst, et al., 2002)        |
| EEY6-2                       | SEY6210 <i>vps23<math>\Delta</math>::HIS3</i>                                                                                                                                                                                                                             | (Babst, et al., 2000)        |
| MBY30                        | SEY6210 <i>vps36<math>\Delta</math>::HIS3</i>                                                                                                                                                                                                                             | (Babst, et al., 2002)        |
| MBY28                        | SEY6210 <i>vps2<math>\Delta</math>::HIS3</i>                                                                                                                                                                                                                              | (Babst, et al., 2002)        |
| BWY102                       | SEY6210 <i>vps24<math>\Delta</math>::HIS3</i>                                                                                                                                                                                                                             | (Babst, et al., 1998)        |
| BY4741                       | <i>MAT<math>\alpha</math> his3<math>\Delta</math>1 leu2<math>\Delta</math>0 ura3<math>\Delta</math>0 met15<math>\Delta</math>0</i>                                                                                                                                        | (Brachmann, et al., 1998)    |
| BY4742                       | <i>MAT<math>\alpha</math> his3<math>\Delta</math>1 leu2<math>\Delta</math>0 ura3<math>\Delta</math>0 lys2<math>\Delta</math>0</i>                                                                                                                                         | (Brachmann, et al., 1998)    |
| JTY3562                      | BY4742 <i>SNF7-mRFP::kanMX</i>                                                                                                                                                                                                                                            | (Huh, et al., 2003)          |
| JTY3986 <sup>b</sup>         | BY4741 <i>cdc10-1-GFP::URA3</i>                                                                                                                                                                                                                                           | This study                   |
| JTY3992                      | BY4741 <i>CDC10-mCherry::kanMX</i>                                                                                                                                                                                                                                        | (McMurray and Thorner, 2008) |
| JTY4000                      | BY4741 <i>elm1<math>\Delta</math>0::kanMX</i>                                                                                                                                                                                                                             | (Winzeler, et al., 1999)     |
| JTY4001                      | BY4741 <i>gin4<math>\Delta</math>0::kanMX</i>                                                                                                                                                                                                                             | (Winzeler, et al., 1999)     |
| JTY4003                      | BY4741 <i>hsl1<math>\Delta</math>0::kanMX</i>                                                                                                                                                                                                                             | (Winzeler, et al., 1999)     |
| JTY4005                      | BY4741 <i>kcc4<math>\Delta</math>0::kanMX</i>                                                                                                                                                                                                                             | (Winzeler, et al., 1999)     |
| JTY4007                      | BY4741 <i>nap1<math>\Delta</math>0::kanMX</i>                                                                                                                                                                                                                             | (Winzeler, et al., 1999)     |
| JTY4008                      | BY4741 <i>siz1<math>\Delta</math>0::kanMX</i>                                                                                                                                                                                                                             | (Winzeler, et al., 1999)     |

|                      |                                                                                                  |                                  |
|----------------------|--------------------------------------------------------------------------------------------------|----------------------------------|
| JTY4457              | BY4742 <i>snf7Δ0::kanMX</i>                                                                      | (Winzeler, et al., 1999)         |
| JTY5595              | BY4742 <i>vps23Δ0::kanMX</i>                                                                     | (Winzeler, et al., 1999)         |
| JTY5596              | BY4742 <i>vps27Δ0::kanMX</i>                                                                     | (Winzeler, et al., 1999)         |
| JTY5597              | BY4742 <i>vps36Δ0::kanMX</i>                                                                     | (Winzeler, et al., 1999)         |
| JTY4510 <sup>c</sup> | BY4742 <i>MYO1-GFP::HIS3MX</i>                                                                   | This study                       |
| JTY4953 <sup>d</sup> | BY4742 <i>snf7Δ0::hphMX</i>                                                                      | This study                       |
| JTY4957              | BY4741 <i>snf7Δ0::kanMX</i>                                                                      | (Winzeler, et al., 1999)         |
| JTY4973 <sup>e</sup> | <i>elm1Δ0::kanMX snf7Δ0::hphMX</i>                                                               | This study                       |
| JTY4974 <sup>f</sup> | <i>cdc10-1-GFP::URA3 snf7Δ0::hphMX</i>                                                           | This study                       |
| JTY4981 <sup>g</sup> | <i>cla4Δ::LEU2 snf7Δ0::hphMX</i>                                                                 | This study                       |
| YCS639 <sup>h</sup>  | JTY3992 <i>snf7Δ::kanMX</i>                                                                      | This study                       |
| YCS640 <sup>i</sup>  | BY4741 <i>cdc10Δ::kanMX</i>                                                                      | This study                       |
| YMVB12               | BY4741 <i>cla4Δ::LEU2</i>                                                                        | (Versele and Thorner, 2004)      |
| DDY2334              | <i>MATα ura3-52 his3 syp1Δ::HIS3 cdc10-1</i>                                                     | D. Drubin, Univ. Calif. Berkeley |
| YEF3923              | <i>MATα his3 leu2 lys2 trp1 ura3 CHS2-GFP::kanMX6</i>                                            | E. Bi, Univ. Penn Med. School    |
| JTY5598 <sup>j</sup> | <i>elm1Δ0::kanMX vps23Δ0::kanMX</i>                                                              | This study                       |
| JTY5599 <sup>k</sup> | <i>elm1Δ0::kanMX vps27Δ0::kanMX</i>                                                              | This study                       |
| JTY5600 <sup>l</sup> | <i>elm1Δ0::kanMX vps36Δ0::kanMX</i>                                                              | This study                       |
| TH2808               | BY4741 <i>P<sub>MYO1</sub>::kanR-(tetO)<sub>7</sub>-TATA URA3::P<sub>CMV</sub>-tTA</i>           | (Mnaimneh, et al., 2004)         |
| JTY5601 <sup>m</sup> | <i>SNF7-mRFP::kanMX P<sub>MYO1</sub>::kanR-(tetO)<sub>7</sub>-TATA ura3Δ0</i>                    | This study                       |
| JTY5602 <sup>n</sup> | <i>SNF7-mRFP::kanMX P<sub>MYO1</sub>::kanR-(tetO)<sub>7</sub>-TATA URA3::P<sub>CMV</sub>-tTA</i> | This study                       |

<sup>a</sup> Cross of SEY6210 with SEY6210.1.

<sup>b</sup> BY4741 was transformed with a *cdc10-1-GFP::URA3* cassette made by PCR with template plasmid pCdc10-1-GFP and primers introducing sequences distal to the *URA3* marker that target it for integration at the *CDC10* locus.

<sup>c</sup> BY4741 was transformed with a *GFP::HIS3MX* cassette made by PCR with template plasmid pFA6a-GFP(S65T)-HIS3MX using primers that target it for integration at the *MYO1* locus.

<sup>d</sup> JTY4457 was transformed with *PvuII*- and *EcoRV*-cut plasmid pAG32.

<sup>e</sup> Spore from cross of JTY4000 with JTY4953.

<sup>f</sup> Spore from cross of JTY3986 with JTY4953.

<sup>g</sup> Spore from cross of YMVB12 with JTY4953.

<sup>h</sup> Spore from cross of JTY4457 with YCS640.

<sup>i</sup> Spore from JTY4012.

- <sup>j</sup> Spore from cross of JTY4000 with JTY5595.
- <sup>k</sup> Spore from cross of JTY4000 with JTY5596.
- <sup>l</sup> Spore from cross of JTY4000 with JTY5597.
- <sup>m</sup> Spore from cross of TH2808 with JTY3562.

Supplementary Table 2. Plasmids used in this work

| Plasmid                   | Relevant Properties                   | Reference                                          |
|---------------------------|---------------------------------------|----------------------------------------------------|
| FD44                      | <i>CEN URA3 CLA4</i>                  | (Cvrckova, et al., 1995)                           |
| pAG32                     | <i>hphMX</i>                          | (Goldstein and McCusker, 1999)                     |
| pCdc10-1-GFP <sup>a</sup> | <i>CEN URA3 cdc10-1-GFP</i>           | This work                                          |
| pFA6a-GFP(S65T)-HIS3MX    | <i>GFP(S65T) HIS3MX</i>               | (Longtine, et al., 1998b)                          |
| pGO216                    | <i>2 μm URA3 BRO1</i>                 | (Wemmer, et al., 2011)                             |
| pLA10                     | <i>CEN URA3 CDC10-GFP</i>             | (Cid, et al., 1998)                                |
| pMWM3                     | <i>2 μm URA3 BRO1(1-183)</i>          | (Wemmer, et al., 2011)                             |
| pRS416-SNF7(L121D)-FLAG   | <i>CEN URA3 SNF7(L121D)-FLAG</i>      | (Saksena, et al., 2009)                            |
| pRS416-CUP-ELM1           | <i>CEN URA3 P<sub>CUP1</sub>-ELM1</i> | Amy Trott, Thorner lab                             |
| pRS416-SNF7-FLAG          | <i>CEN URA3 SNF7-FLAG</i>             | (Saksena, et al., 2009)                            |
| pRS416-SNF7-GFP           | <i>CEN URA3 SNF7-GFP</i>              | (Teis, et al., 2008)                               |
| YEpl3-ELM1                | <i>2 μm LEU2 ELM1</i>                 | Martin Schmidt, Univ. Pittsburg School of Medicine |

<sup>a</sup> pLA10 cut with *EcoRI* and *BamHI* was transformed into *cdc10-1* strain DDY2234.

## Legend to Supplementary Figure

### Supplementary Figure 1.

Single-focal-plane differential interference contrast ('DIC') or epifluorescence ('RFP') micrographs of cells of the indicated genotypes cultured overnight at 30°C in YPD medium containing, where indicated ('+ tetracycline'), 50  $\mu\text{g/ml}$  tetracycline hydrochloride, which allows the product of the *tTA* gene (expressed constitutively from the heterologous *CMV* promoter) to repress transcription from the *MYO1* promoter into which seven tandem copies of the *tetO* sequence are integrated (' $P_{MYO1}::(tetO)_7$ '). Strains were: JTY5602 ('*SNF7-mRFP P<sub>MYO1</sub>::(tetO)<sub>7</sub> P<sub>CMV</sub>-tTA*') and JTY5601 ('*SNF7-mRFP P<sub>MYO1</sub>::(tetO)<sub>7</sub>*'). The culture not exposed to tetracycline was instead exposed to the same volume of solvent (100% ethanol).

## References

Babst, M., Katzmann, D.J., Estepa-Sabal, E.J., Meerloo, T. and Emr, S.D. (2002). Escrt-III: an endosome-associated heterooligomeric protein complex required for mvb sorting. *Dev. Cell* 3, 271-282.

Babst, M., Odorizzi, G., Estepa, E.J. and Emr, S.D. (2000). Mammalian tumor susceptibility gene 101 (TSG101) and the yeast homologue, Vps23p, both function in late endosomal trafficking. *Traffic* 1, 248-258.

Babst, M., Sato, T.K., Banta, L.M. and Emr, S.D. (1997). Endosomal transport function in yeast requires a novel AAA-type ATPase, Vps4p. *EMBO J.* 16, 1820-1831.

Babst, M., Wendland, B., Estepa, E.J. and Emr, S.D. (1998). The Vps4p AAA ATPase regulates membrane association of a Vps protein complex required for normal endosome function. *EMBO J.* 17, 2982-2993.

Brachmann, C.B., Davies, A., Cost, G.J., Caputo, E., Li, J., Hieter, P. and Boeke, J.D. (1998). Designer deletion strains derived from *Saccharomyces cerevisiae* S288C: a useful set of strains and plasmids for PCR-mediated gene disruption and other applications. *Yeast* 14, 115-132.

Cid, V.J., Adamikova, L., Cenamor, R., Molina, M., Sanchez, M. and Nombela, C. (1998). Cell integrity and morphogenesis in a budding yeast septin mutant. *Microbiology* 144, 3463-3474.

Cvrckova, F., De Virgilio, C., Manser, E., Pringle, J.R. and Nasmyth, K. (1995). Ste20-like protein kinases are required for normal localization of cell growth and for cytokinesis in budding yeast. *Genes Dev.* 9, 1817-1830.

Goldstein, A.L. and McCusker, J.H. (1999). Three new dominant drug resistance cassettes for gene disruption in *Saccharomyces cerevisiae*. *Yeast* 15, 1541-1553.

Huh, W.K., Falvo, J.V., Gerke, L.C., Carroll, A.S., Howson, R.W., Weissman, J.S. and O'Shea, E.K. (2003). Global analysis of protein localization in budding yeast. *Nature* 425, 686-691.

Longtine, M.S., McKenzie, A., 3rd, Demarini, D.J., Shah, N.G., Wach, A., Brachat, A., Philippsen, P. and Pringle, J.R. (1998). Additional modules for versatile and economical PCR-based gene deletion and modification in *Saccharomyces cerevisiae*. *Yeast* 14, 953-961.

McMurray, M.A. and Thorner, J. (2008). Septin stability and recycling during dynamic structural transitions in cell division and development. *Curr. Biol.* 18, 1203-1208.

Mnaimneh, S., Davierwala, A.P., Haynes, J., Moffat, J., Peng, W.T., Zhang, W., Yang, X., Pootoolal, J., Chua, G., Lopez, A., et al. (2004). Exploration of essential gene functions via titratable promoter alleles. *Cell* 118, 31-44.

Odorizzi, G., Katzmann, D.J., Babst, M., Audhya, A. and Emr, S.D. (2003). Bro1 is an endosome-associated protein that functions in the MVB pathway in *Saccharomyces cerevisiae*. *J. Cell Sci.* *116*, 1893-1903.

Robinson, J.S., Kliensky, D.J., Banta, L.M. and Emr, S.D. (1988). Protein sorting in *Saccharomyces cerevisiae*: isolation of mutants defective in the delivery and processing of multiple vacuolar hydrolases. *Mol. Cell Biol.* *8*, 4936-4948.

Saksena, S., Wahlman, J., Teis, D., Johnson, A.E. and Emr, S.D. (2009). Functional reconstitution of ESCRT-III assembly and disassembly. *Cell* *136*, 97-109.

Teis, D., Saksena, S. and Emr, S.D. (2008). Ordered assembly of the ESCRT-III complex on endosomes is required to sequester cargo during MVB formation. *Dev. Cell* *15*, 578-589.

Versele, M. and Thorner, J. (2004). Septin collar formation in budding yeast requires GTP binding and direct phosphorylation by the PAK, Cla4. *J. Cell Biol.* *164*, 701-715.

Wemmer, M., Azmi, I., West, M., Davies, B., Katzmann, D. and Odorizzi, G. (2011). Bro1 binding to Snf7 regulates ESCRT-III membrane scission activity in yeast. *J. Cell Biol.* *192*, 295-306.

Winzeler, E.A., Shoemaker, D.D., Astromoff, A., Liang, H., Anderson, K., Andre, B., Bangham, R., Benito, R., Boeke, J.D., Bussey, H., et al. (1999). Functional characterization of the *S. cerevisiae* genome by gene deletion and parallel analysis. *Science* *285*, 901-906.
